# Supplementary material for: Methicillin-resistant Staphylococcus aureus eradication in cystic fibrosis patients: A randomized multicenter study
Source: PLoS One. 2019 Mar 22;14(3):e0213497. doi: 10.1371/journal.pone.0213497 (PMC6430412; doi:10.1371/journal.pone.0213497)
Supplement: S1 Dataset — (XLS) [file pone.0213497.s004.xls]

## Sheet: MRSA_BASALE991066
id	data_creaz	COD_PAZ	ARM	GENDER	PRIMARY OUTCOME	DROP-OUT/excluded from analysis
1		AZ001OVDY	A	1	1
3		AZ003NYQA	A	1	1
6		AZ006IGOV	A	1	1
8		AZ008VUSY	A	1	2
12		AZ012AZNE	A	2		x
20		AZ020OGCU	A	2	1
27		AZ027ICOM	A	1	2
28		AZ028ODTA	A	1		x
32		AZ032AFLO	A	1	2
33		AZ033CSUE	A	1	1
36		AZ036RCLO	A	1	2
43		AZ043ILOL	A	1		x
44		AZ044TIZE	A	2	2
52		AZ052IDUA	A	1	2
54		AZ054KIBI	A	2		x
57		AZ057GIAG	A	2		x
60		AZ060VICU	A	1	1
34		ME034UGVY	A	1	1
39		ME039ORNA	A	1	1
17		MI017ODWE	A	1	2
48		MI048ANZI	A	1		x
18		NA018ZAPT	A	1	1
11		RO011JOGA	A	1	1
40		RO040UOCE	A	2		x
47		RO047CEPS	A	2		x
49		RO049GICE	A	2		x
50		RO050CSGP	A	1	1
51		RO051EZUS	A	1		x
53		RO053CEPT	A	2	1
2		AZ002OAZE	B	2		x
4		AZ004FEAT	B	1		x
5		AZ005ODEV	B	2	2
7		AZ007BOBA	B	2	2
9		AZ009OSJC	B	2		x
10		AZ010ZEBY	B	1		x
13		AZ013LDEI	B	1		x
14		AZ014RUQA	B	1	2
19		AZ019UMIB	B	2		x
21		AZ021WIFE	B	1		x
23		AZ023UGEL	B	1		x
29		AZ029WERY	B	2	2
30		AZ030LIIM	B	2		x
31		AZ031CRLA	B	1		x
35		AZ035DITO	B	2	2
37		AZ037JAEL	B	1		x
38		AZ038TITU	B	2	2
41		AZ041OFRA	B	1		x
42		AZ042GEOF	B	1		x
45		AZ045PIPT	B	1		x
46		AZ046EZWA	B	1		x
55		AZ055UZAS	B	2	1
56		AZ056NYUD	B	1	1
58		AZ058ABVY	B	2	1
59		AZ059SYEP	B	2		x
61		AZ061ANAN	B	2	1
22		MI022CAPU	B	2		x
24		MI024UIDA	B	2		x
25		MI025VEOZ	B	1		x
15		RO015UMOD	B	2	2
16		RO016APCY	B	2	2
26		RO026NUUA	B	1	1
				1= male	1= NO MRSA
				2= female	2= persistence of MRSA
