# Supplementary material for: Methicillin-resistant Staphylococcus aureus eradication in cystic fibrosis patients: A randomized multicenter study
Source: PLoS One. 2019 Mar 22;14(3):e0213497. doi: 10.1371/journal.pone.0213497 (PMC6430412; doi:10.1371/journal.pone.0213497)
Supplement: S2 Dataset — Days in hospital and treatments. (XLS) [file pone.0213497.s005.xls]

## Sheet: Foglio1
Number of PEX	Days in Hospital	Days Ev Treatment	Days oral treatment	Days inhalation
0	0	0	40	21
1	0	21	100	180
1	0	0	40	100
3	19	22	150	180
1	0	0	20	100
1	0	0	21	0
1	10	21	14	0
1	0	0	45	0
1	8	21	21	28
1	0	0	40	0
2	14	0	50	0
2	10	22	35	130
0	0	0	35	0
2	12	14	28	0
1	8	0	28	92
0	0	0	18	0
0	0	0	21	0
0	0	0	29	0
1	0	0	15	14
1	4.26316	6.36842	39.4737	44.4737		Mean
0.816497	6.16299	9.76508	32.9534	64.12		SD
1	0	0	29	0		Median
