# Supplementary material for: Methicillin-resistant Staphylococcus aureus eradication in cystic fibrosis patients: A randomized multicenter study
Source: PLoS One. 2019 Mar 22;14(3):e0213497. doi: 10.1371/journal.pone.0213497 (PMC6430412; doi:10.1371/journal.pone.0213497)
Supplement: S3 Dataset — Days in hospital and treatments. (XLS) [file pone.0213497.s006.xls]

## Sheet: Foglio1
Number of PEX	Days in Hospital	Days ev treatment	Days oral treatment	Days inhalation
0	0	0	0	0
3	9	31	120	80
1	0	0	28	0
0	0	0	28	0
1	0	0	120	90
1	23	22	120	90
1	4	15	28	70
3	5	15	14	21
0	0	0	14	0
0	0	0	14	90
0	0	0	14	90
0	0	0	28	90
1	6	0	6	0
0.846154	3.61538	6.38462	41.0769	47.7692	Mean
1.06819	6.56428	10.6657	45.8448	43.3746	SD
1	0	0	28	70	Median
