# Supplementary material for: Methicillin-resistant Staphylococcus aureus eradication in cystic fibrosis patients: A randomized multicenter study
Source: PLoS One. 2019 Mar 22;14(3):e0213497. doi: 10.1371/journal.pone.0213497 (PMC6430412; doi:10.1371/journal.pone.0213497)
Supplement: S4 Dataset — (XLSX) [file pone.0213497.s007.xlsx]

## Sheet: Foglio1
0.3	-0.3
Arm A	Arm B
0.79	1.1
0.3	0
-0.3	-0.6
-1.1	0
0.22	-5.2
-0.25	0
-0.2	-0.4
1.59	0.8
1.02	-0.1
0.25	-0.3
-0.4	0.9
-0.27	-0.9
3
0.7	-0.384615	Variation BMI arm B Mean
-1.37	1.5625	SD
0
2.1
4
0.546316
1.33801
