# Supplementary material for: Methicillin-resistant Staphylococcus aureus eradication in cystic fibrosis patients: A randomized multicenter study
Source: PLoS One. 2019 Mar 22;14(3):e0213497. doi: 10.1371/journal.pone.0213497 (PMC6430412; doi:10.1371/journal.pone.0213497)
Supplement: S5 Dataset — (XLSX) [file pone.0213497.s008.xlsx]

## Sheet: Foglio1
Arm A	Arm B
2	-3
1	-7
0	-8
12	1
17	-7
52	-5
-1	0
-17	-1
18	2
1	-1
5	6
4	9
7
0
6
7.13333	-1.16667	Mean
14.9278	5.25415	SD
